# The scent of the fly

Paul G. Becher<sup>1</sup>, Sebastien Lebreton<sup>1</sup>, Erika A. Wallin<sup>2</sup>, Erik Hedenström<sup>2</sup>, Felipe Borrero<sup>3</sup>, Marie Bengtsson<sup>1</sup>, Volker Jörger<sup>4</sup>, Peter Witzgall<sup>1\*</sup>

<sup>1</sup>Department of Plant Protection Biology, Swedish University of Agricultural Sciences, Box 102, 23053 Alnarp, Sweden

<sup>2</sup>Department of Chemical Engineering, Mid Sweden University, Holmgatan 10, 85170 Sundsvall, Sweden

<sup>3</sup>Biological Control Laboratory, Colombian Corporation of Agricultural Research, AA 240142 Las Palmas, Bogota, Colombia

<sup>4</sup>Staatliches Weinbauinstitut, Merzhauserstr. 119, 79100 Freiburg, Germany

\*Correspondence: Peter Witzgall, SLU, Box 102, 23053 Alnarp, Sweden  
phone +46 70 2426939, peter.witzgall@slu.se

## Abstract

(Z)-4-undecenal (Z4-11Al) is the volatile pheromone produced by females of the vinegar fly *Drosophila melanogaster*. Female flies emit Z4-11Al at few nanograms per hour, for species-specific communication and mate-finding. Tests with synthetic Z4-11Al show that it has a characteristic off-flavour, which we perceive even at the small amounts produced by one female fly. Since only females produce Z4-11Al, and not males, we can reliably distinguish between single *D. melanogaster* males and females, according to their scent. A wine-tasting panel finds that we sense as little as 1 ng synthetic Z4-11Al in a glass of wine, and 10 ng Z4-11Al is perceived as a loud off-flavour. This corroborates the observation that a glass of wine is spoilt by a single *D. melanogaster* fly falling into it, which we here show is caused by Z4-11Al. The biological role of Z4-11Al or structurally related aldehydes in humans and the basis for this semiochemical convergence remains yet unclear.

## Keywords

pheromone, semiochemical, odorant, off-flavour, olfaction, wine

## 1. Introduction

All living things communicate with chemicals. Unlike sounds or sights, chemicals interconnect species across the kingdoms, and enable information exchange between animals, plants and microorganisms [1]. A fascinating, recurrent observation is that the same compound is bioactive in different species and context. The evolutionary convergence of semiochemicals may be due to their physico-chemical properties but is first of all expected to reflect biological significance, including the underlying biochemical pathways and precursors.

Linalool, for example, is found in foliage, flowers and fruit of many plants. Herbivory upregulates linalool production, which protects against further infestation [2]. Plant-produced linalool enhances mate-finding in some plant-feeding insects, while other species release linalool as a sex pheromone component [3-6]. The (R) and (S) enantiomers differentially attract pollinators and herbivores, for feeding and oviposition [7-9], and enantiomeric changes during phenological development modulate our perception of flower aroma [10]. In mammals, linalool induces psychopharmacological effects via glutamate receptors [11,12], perception via odorant receptors (Ors) produces a sweet, floral note and makes a prominent contribution to the bouquet of flowers, fruit and wine, where both grape and yeast are a source of linalool [13-15].

Citrus fruit is a preferred oviposition substrate for the fruit fly *Drosophila melanogaster* [16], provided that yeast is present [17]. Both citrus peel and brewer's yeast produce linalool [14,18], which the flies perceive via several Ors, including Or69a [19,20]. Interestingly, the Or69a olfactory channel encodes in addition the recently identified fly pheromone (Z)-4-undecenal (Z4-11Al) [20], which is also found in citrus peel [18].

While collecting volatiles from *D. melanogaster* flies, we discovered that we can reliably distinguish single male from female flies by their scent, which is strongly reminiscent of Z4-11Al. We therefore employed a sensory panel to verify whether we can indeed discern single flies, and whether the newly discovered pheromone Z4-11Al contributes to the scent of the female fly.

## 2. Materials and methods

### (a) Chemicals

Isomeric and chemical purity of synthetic Z4-11Al were 98.6% and >99.9%, respectively, according to gas chromatography coupled to mass spectrometry (6890 GC and 5975 MS, Agilent Technologies, Santa Clara, CA, USA). Ethanol (redistilled, >99.9% purity; Merck, Darmstadt, Germany) was used as solvent.

### (b) Sensory evaluation

Eight members of the sensory panel for organoleptic tests for the wine-growing area of Baden (Germany) evaluated the odour of *D. melanogaster* and synthetic Z4-11Al. Each test comprised three glasses, control and two treatments, which were presented in random order. The panel was asked to score odour intensity, ranging from 1 (weak, silent) to 9 (strong, loud) and to comment on odour quality. The first test compared the odour from single male and female flies. Flies were kept during 5 min in empty wine tasting glasses (215 ml) and were released shortly before tests. The second test compared a glass impregnated with fly odour and Z4-11Al (10 ng in 10 µl ethanol), which was applied to an empty glass, the solvent was allowed to evaporate during 2 min. Next, 10 ng Z4-11Al or a female fly were added to a glass filled with either water or white wine (dry Pinot blanc, Freiburg 2013, Staatsweinkellerei Freiburg). The fly was removed after 5 min, prior to testing. Finally, 1 or 5 ng Z4-11Al was added to wine.

### (c) Statistical analysis

Odor panel data was analyzed using one-tailed analysis of variance (ANOVA) followed by a Tukey test. Normality was tested using Shapiro-Wilk and homoscedasticity was tested using Levene's test. All analysis were carried out using SPSS v. 20 (IBM Corp, 2011).

## 3. Results

*D. melanogaster* females (figure 1) produce a distinctive scent. The sensory panel found the odour of single female flies to be stronger and qualitatively clearly different from male flies (figure 2a).

Chemical analysis has shown earlier that Z4-11Al and its precursor, the cuticular hydrocarbon (Z,Z)-7,11-heptacosadiene, are produced by female flies, not by males [20,21]. Our panel tests established that synthetic Z4-11Al has a distinctive odour (figure 2b). Moreover, a female fly and 10 ng Z4-11Al were found to be similar, with respect to

odour quality and intensity, when presented in an empty glass, in water or wine (figure 2c,d,e). Since 10 ng Z4-11Al was assessed as slightly louder than the odour of a fly, we compared Z4-11Al at 1 ng and 5 ng, showing that as little as 1 ng Z4-11Al was clearly perceptible (Fig. 2f). Even at small amounts, Z4-11Al was perceived as a somewhat unpleasant off-flavour.

The detection threshold for Z4-11Al is apparently similar in flies and men, since we clearly sense Z4-11Al released from a single fly (figure 2a). Chemical analysis found that *D. melanogaster* females released Z4-11Al at a rate of 2.4 ng/h and solvent extracts of fly cuticula contained 0.3 ng Z4-11Al/female [20].

## 4. Discussion

The sensory panel confirmed that we sensitively smell Z4-11Al, the female-produced pheromone of the fruit fly *D. melanogaster* [20] and that we can reliably distinguish single female from male flies. This supports the observation that one fly spoils a glass of wine, after falling into it - provided it is of the female sex. Other fly volatiles may contribute to our perception of fly odour. However, Z4-11Al is the most abundant compound released by females only, whereas other, structurally related compounds are found in both sexes [20].

An explanation for convergent perception of Z4-11Al is, however, not at hand. Little is known about the occurrence of Z4-11Al in nature and a possible biological role in humans remains unclear. Z4-11Al has also been found in citrus peel [18] and in the anal gland of the rabbit, where perception effects heart rate [22].

A characteristic citrus-like scent emanates from colonies of crested auklet, a seabird (Douglas et al. 2001). Two unsaturated aldehydes, including (Z)-4-decenal (Z4-10Al) are main constituents of this bird odour [23]. In crested auklet, Z4-10Al likely plays a role as an ectoparasite repellent and a signal of mate quality [23,24]. (E)-2-nonenal is another odour-active unsaturated aldehyde, found in mushrooms and wine [25-27].

The olfactory sense in animals plays a key role during habitat adaptation. Tuning of Ors to habitat cues is thought to create a bias for mate-finding signals that match or are structurally similar to habitat odorants [28]. This idea yields a tentative scenario for the convergence of semiochemicals. Insects and other animals have long been associated with yeasts that facilitate digestion of plant materials, provide nutrients and protection of food from antagonistic microorganisms.

Yeast and fruit volatiles could have mediated aggregations at feeding sites, while fly-produced compounds sharing structural motifs, may have been secondarily been adopted

as mating signals via established sensory channels dedicated to habitat odorants. The phylogenetic divergence of *Drosophila* Ors is accessible to experimental investigation. A current challenge is to extend studies of Or phylogenetic divergence from insects to mammals, towards an understanding of the chemical vocabulary that interconnects us with other living things.

**Data accessibility.** Data is completely included in the figure. **Authors' contributions.** P.G.B. sensed the fly scent, P.G.B., S.L., M.B. and V.J. conceived the idea and contributed to the experiment, F.B. calculated statistics, E.W. and E.H. synthesized the test chemical, P.W. supervised the project and wrote the manuscript, all authors contributed to and approved the final version of the manuscript. **Competing interests.** Authors declare no competing interests. **Funding.** Supported by the Linnaeus initiative "Insect Chemical Ecology, Ethology and Evolution" (Formas, SLU). **Acknowledgements.** We thank the members of the sensory panel (Freiburg, Germany) for evaluating the fly scent and Cyrus Mahmoudi (comgraphix.de, Germany) for sharing a fruit fly photograph.

## References

1. Schultz JC, Appel HM. 2004 Cross-kingdom cross-talk: hormones shared by plants and their insect herbivores. *Ecology* **85**, 70-77. (doi:10.1890/02-0704)
2. Mithöfer A, Boland W. 2012 Plant defense against herbivores: chemical aspects. *Annu. Rev. Plant Biol.* **63**, 431-450. (doi:10.1146/annurev-arplant-042110-103854)
3. Hefetz A, Batra SWT, Blum MS. 1979 Linalool, neral and geranial in the mandibular glands of *Colletes* bees - an aggregation pheromone. *Cell. Molec. Life Sc.* **35**, 319-320. (doi:10.1007/BF01964324)
4. Aldrich JR, Lusby WR, Kochansky JP. 1986 Identification of a new predaceous stink bug pheromone and its attractiveness to the eastern yellowjacket. *Cell Molec Life Sc.* **42**, 583-585. (doi:10.1007/BF01946714)
5. Leal WS, Sawada M, Matsuyama S, Kuwahara Y, Hasegawa M. 1993 Unusual periodicity of sex pheromone production in the large black chafer *Holotrichia parallela*. *J. Chem. Ecol.* **19**, 1381-1391. (doi:10.1007/BF00984883)
6. Yang Z, Bengtsson M, Witzgall P. 2004 Host plant volatiles synergize response to sex pheromone in codling moth, *Cydia pomonella*. *J. Chem. Ecol.* **30**, 619-629. (doi:10.1023/B:JOEC.0000018633.94002.af)
7. Reisenman CE, Riffell JA, Bernays EA, Hildebrand JG. 2010 Antagonistic effects of floral scent in an insect-plant interaction. *Proc. R. Soc. B* **277**, 2371-2379. (doi:10.1098/rspb.2010.0163)
8. Saveer AM, Kromann S, Birgersson G, Bengtsson M, Lindblom T, Balkenius A, Hansson BS, Witzgall P, Becher PG, Ignell R. 2012 Floral to green: mating switches moth olfactory coding and preference. *Proc. R. Soc. B* **279**, 2314-2322. (doi:10.1098/rspb.2011.2710)
9. Raguso RA. 2016 More lessons from linalool: insights gained from a ubiquitous floral volatile. *Curr. Op. Plant Biol.* **32**, 31-36. (doi:10.1016/j.pbi.2016.05.007)
10. Pragadheesh VS, Chanotiya CS, Rastogi S, Shasany AK (2017) Scent from *Jasminum grandiflorum* flowers: investigation of the change in linalool enantiomers at various developmental stages using chemical and molecular methods. *Phytochemistry* **140**, 83-94. (doi:10.1016/j.phytochem.2017.04.018)
11. Elisabetsky E, Marschner J, Souza DO. 1995 Effects of linalool on glutamatergic system in the rat cerebral cortex. *Neurochem. Res.* **20**, 461-465. (doi:10.1007/BF00973103)
12. Nakamura A, Fujiwara S, Matsumoto I, Abe K. 2009 Stress repression in restrained rats by (R)-(-)-linalool inhalation and gene expression profiling of their whole blood cells. *J. Agric. Food Chem.* **57**, 5480-5485. (doi:10.1021/jf900420g)
13. Lewinsohn E, Schalechet F, Wilkinson J, Matsui K, Tadmor Y, Nam KH, Amar O, Lastochkin E, Larkov O, Ravid U, Hiatt W, Gepstein S, Pichersky E. 2001 Enhanced levels of the aroma and flavor compound S-linalool by metabolic engineering of the terpenoid pathway in tomato fruits. *Plant Physiol.* **127**, 1256-1265. (doi:10.1104/pp.010293)

14. Carrau FM, Medina K, Boido E, Farina L, Gaggero C, Dellacassa E, Versini G, Henschke PA. 2005 De novo synthesis of monoterpenes by *Saccharomyces cerevisiae* wine yeasts. *FEMS Microbiol. Lett.* **243**, 107–15. (doi:10.1016/j.femsle.2004.11.050)
15. Swiegers JH, Bartowsky EJ, Henschke PA, Pretorius IS. 2005 Yeast and bacterial modulation of wine aroma and flavour. *Austral. J. Grape Wine Res.* **11**, 139-173. (doi:10.1111/j.1755-0238.2005.tb00285.x)
16. Dweck HK, Ebrahim SA, Kromann S, Bown D, Hillbur Y, Sachse S, Hansson BH, Stensmyr MC. 2013 Olfactory preference for egg laying on citrus substrates in *Drosophila*. *Curr. Biol.* **23**, 2472–80. (doi: 10.1016/j.cub.2013.10.047)
17. Becher PG, Flick G, Rozpedowska E, Schmidt A, Hagman A, Lebreton S, Larsson MC, Hansson BS, Piskur J, Witzgall P, Bengtsson M. 2012 Yeast, not fruit volatiles mediate attraction and development of the fruit fly *Drosophila melanogaster*. *Funct. Ecol.* **26**, 822-828 (doi:10.1111/j.1365-2435.2012.02006.x)
18. Chisholm MG, Jell JA, Cass DM. 2003 Characterization of the major odorants found in the peel oil of *Citrus reticulata* Blanco cv. Clementine using gas chromatography-olfactometry. *Flavour Fragrance J.* **18**, 275–281. (doi:10.1002/ffj.1172)
19. Münch D, Galizia CG. 2016 DoOR 2.0 - comprehensive mapping of *Drosophila melanogaster* odorant responses. *Sci Rep.* **6**, 21841. (doi:10.1038/srep21841)
20. Lebreton S, Borrero-Echeverry F, Gonzalez F, Solum M, Wallin E, Hedenström E, Hansson BS, Gustavsson A-L, Bengtsson M, Birgersson G, Walker WB, Dweck H, Becher PG, Witzgall P. 2017 A *Drosophila* female pheromone elicits species-specific long-range attraction via an olfactory channel with dual specificity for sex and food. *BMC Biology* **15**, 88. (doi:10.1186/s12915-017-0427-x)
21. Billeter JC, Atallah J, Krupp JJ, Millar JG, Levine JD. 2009 Specialized cells tag sexual and species identity in *Drosophila melanogaster*. *Nature* **461**, 987-U250. (doi:10.1038/nature08495)
22. Goodrich BS, Hesterman ER, Murray KE, Mykytowycz R, Stanley G, Sugowdz G. 1978 Identification of behaviorally significant volatile compounds in the anal gland of the rabbit, *Oryctolagus cuniculus*. *J. Chem. Ecol.* **4**, 581-594. (doi:10.1007/BF00988922)
23. Douglas H, Jones T, Conner W. 2001 Heteropteran chemical repellents identified in the citrus odor of a seabird (crested auklet: *Aethia cristatella*): evolutionary convergence in chemical ecology. *Naturwissenschaften.* **88**, 330-332. (doi:10.1007/s001140100236)
24. Caro SP, Balthazart J. 2010 Pheromones in birds: myth or reality? *J. Comp. Physiol. A* **196**, 751-766. (doi:10.1007/s00359-010-0534-4)
25. Wood WF, Brandes ML, Watson RL, Jones RL, Largent DL. 1994 trans-2-Nonenal, the cucumber odor of mushrooms. *Mycologia* **4**, 561-563. (doi:10.2307/3760750)
26. Chatonnet P, Dubourdieu D. 1998 Identification of substances responsible for the 'sawdust' aroma in oak wood. *J. Sc. Food Agric.* **76**, 179-188. (doi:10.1002/(SICI)1097-0010(199802)76:2<179::AID-JSFA924>3.3.CO;2-Y)
27. Ferreira V, Culleré L, López R, Cacho J. 2004 Determination of important odor-active aldehydes of wine through gas chromatography-mass spectrometry of their O-(2, 3, 4, 5, 6-pentafluorobenzyl) oximes formed directly in the solid phase extraction

cartridge used for selective isolation. *J. Chromatogr. A* **1028**, 339-345.  
(doi:10.1016/j.chroma.2003.11.104)

28. Endler JA. 1992 Signals, signal conditions, and the direction of evolution. *Am. Naturalist* **139**, S125-S153. (doi:10.1086/285308)

## Legends

**Fig. 1** Fruit fly *D. melanogaster* female with exposed ovipositor on blueberry (Picture by Cyrus Mahmoudi).

(colour & high resolution version available).

**Fig. 2** Sensory evaluation of fly odor and synthetic (Z)-4-undecenal (Z4-11Al). Odor intensity scale ranges from 1 (weak) to 9 (strong), symbols show evaluation by individual test panel members, mean intensity ratings followed by different letters are significantly different ( $p < 0.001$ ). Olfactory intensity of (a) the odour of a single *D. melanogaster* male and female fly adsorbed during 5 min in an empty wine glass ( $F=96.711$ ), (b) 10 ng synthetic Z4-11Al and solvent (ethanol) ( $F=106.732$ ), (c) 10 ng Z4-11Al and the odour of a single *D. melanogaster* female fly in an empty glass ( $F=34.720$ ), (d) in a glass with water ( $F=16.689$ ), (e) in a glass with wine ( $F=12.952$ ), (f) 1 ng and 5 ng Z4-11Al in a glass with wine ( $F=110.694$ ).



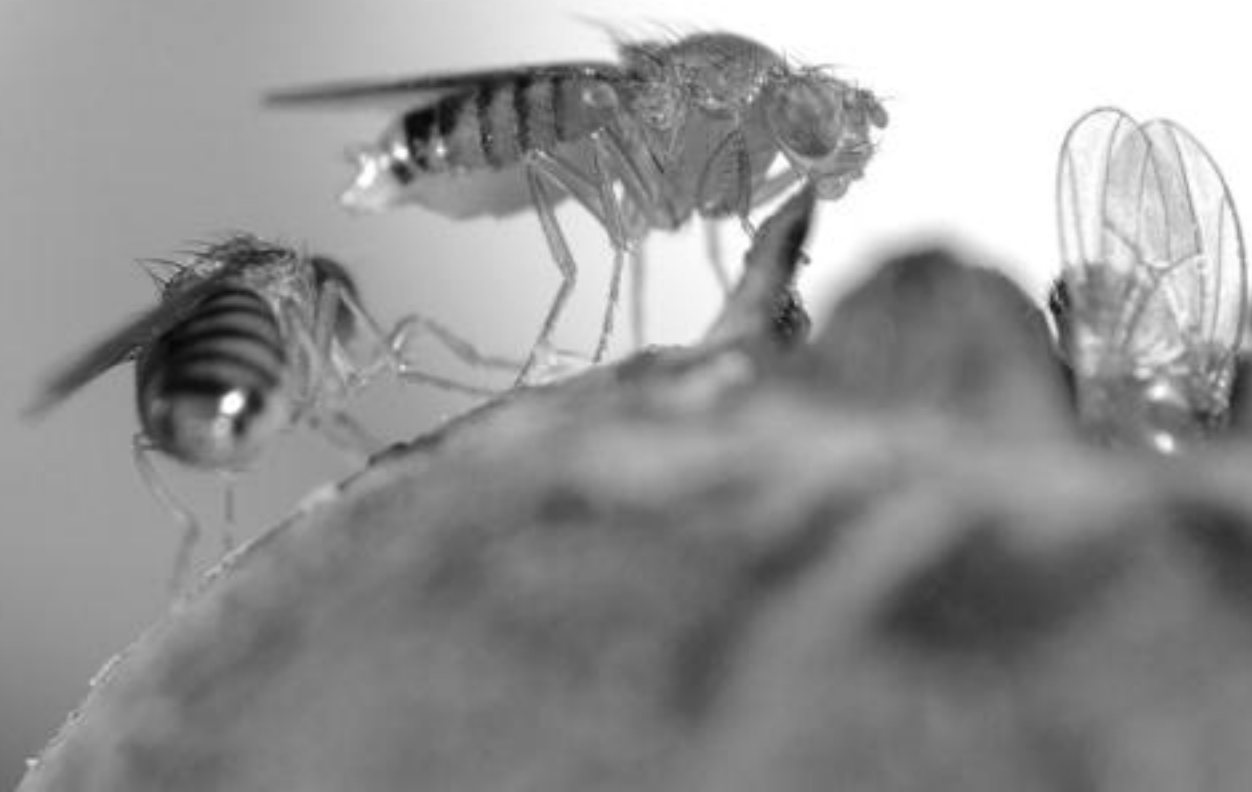

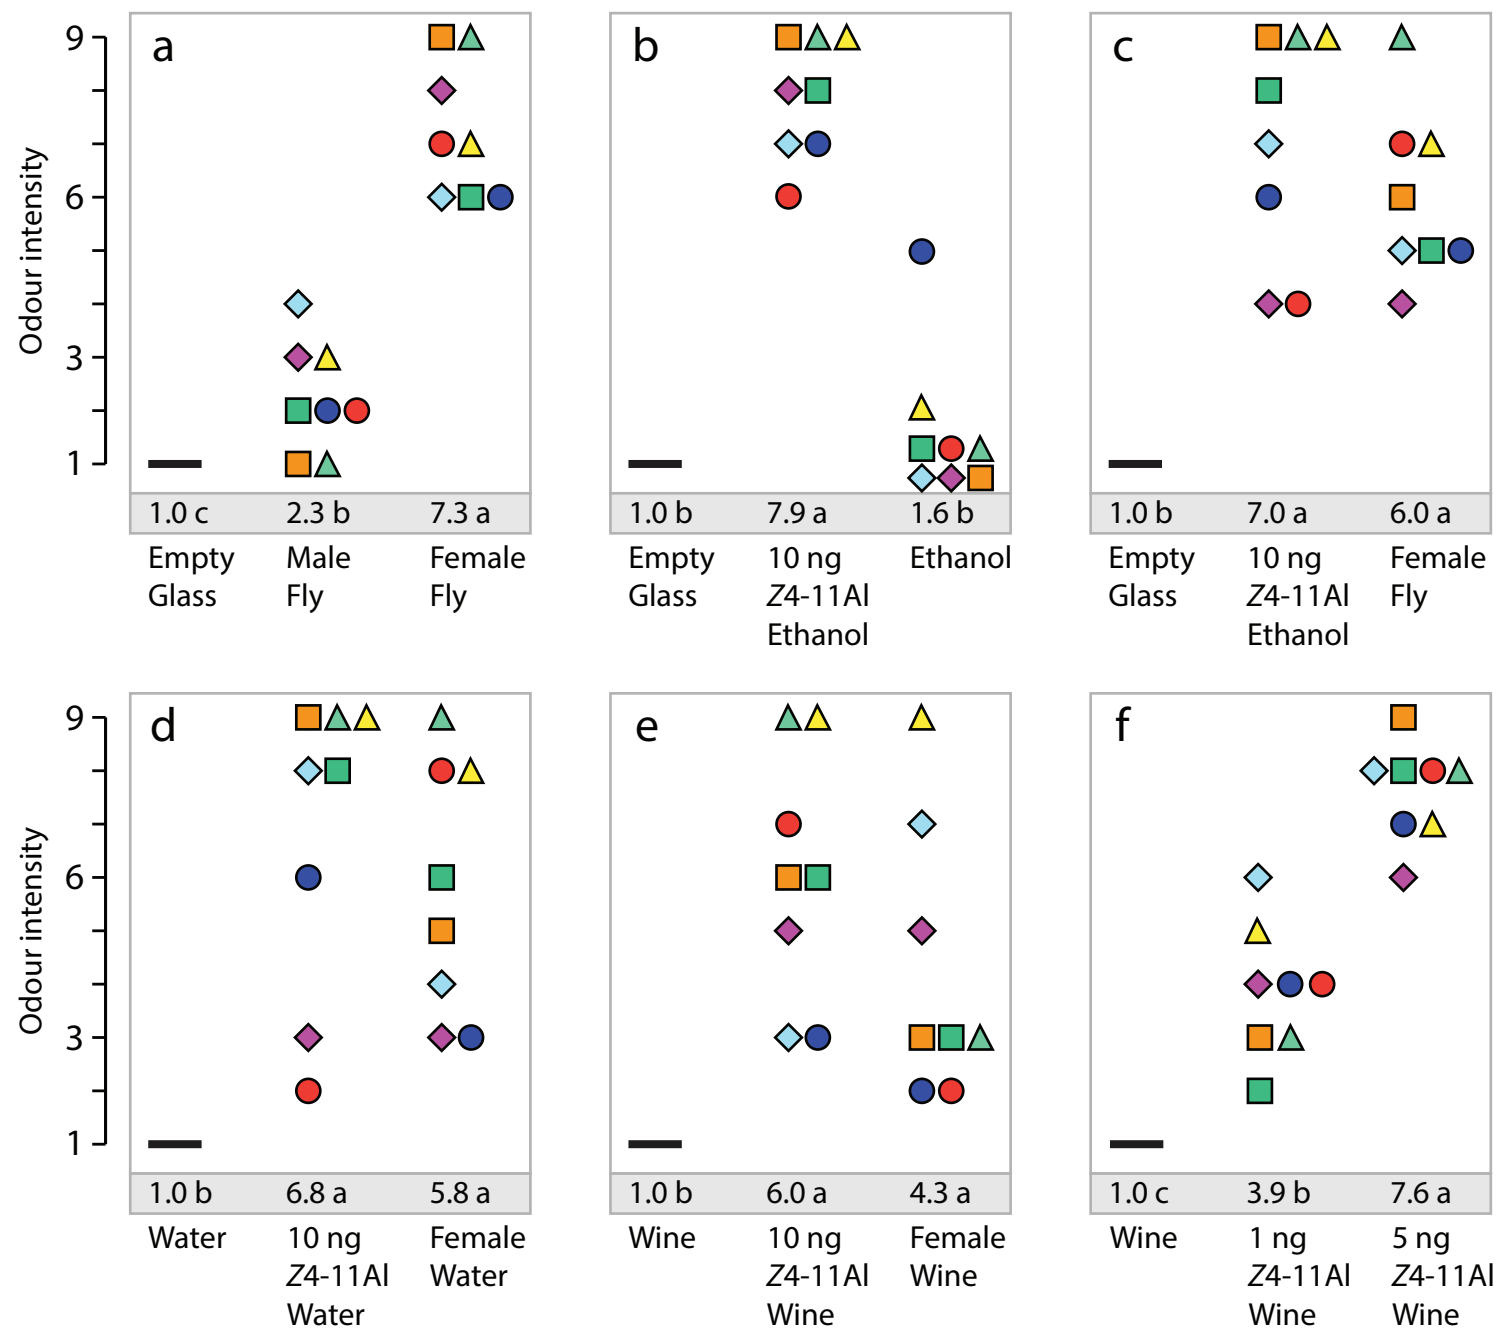

Source: https://www.biorxiv.org/content/10.1101/206375v2.full.pdf
